# Supplementary material
Source: PubMed Central journal article supplement (PMC3393595)
Supplement: supp_86.12.6768_FigS1-S5.pdf [file supp_86.12.6768_FigS1-S5.pdf]

## Supplementary materials:

### Capsid structure and its Stability at the Late Stages of Bacteriophage SPP1 Assembly

Helen E. White, Michael B. Sherman, Sandrine Brasilès, Eric Jacquet, Philippa Seavers ,  
Paulo Tavares, Elena V. Orlova

**Table S1**

Data collection statistics and structural features of the SPP1 capsids

| Capsid                        | Imaging detector | Image ## | Defocus range ( $\mu\text{m}$ ) | Resolution ( $\text{\AA}$ ) | Average diameter ( $\text{\AA}$ ) | Wall (shell) ( $\text{\AA}$ ) | Spike height ( $\text{\AA}$ ) | Average inter-DNA distance ( $\text{\AA}$ ) |
|-------------------------------|------------------|----------|---------------------------------|-----------------------------|-----------------------------------|-------------------------------|-------------------------------|---------------------------------------------|
| <b>FP</b>                     | SO163 film       | 5293     | 0.7-2.5                         | 8.8                         | 610                               | 27                            | 35                            | 23.5 $\pm$ 2.5                              |
| <b>EP</b>                     | SO163 film       | 1243     | 0.7-2.5                         | 10.5                        | 610                               | 27                            | 35                            | n/a                                         |
| <b>H</b>                      | CCD              | ~4000    | 1.0-3.5                         | 11.7                        | 610                               | 27                            | 35                            | 24.5 $\pm$ 2.5                              |
| <b>H<math>\Delta</math>12</b> | CCD              | ~3200    | 1.0-3.5                         | 15.1                        | 600                               | 27                            | n/a                           | 24.5 $\pm$ 2.5                              |

**Table S2**

Role of capsid auxiliary proteins. Phages that require auxiliary proteins for capsid stability are shaded blue, while those that do not are shaded green.

| Phage      | Protein name | Location                                           | References |
|------------|--------------|----------------------------------------------------|------------|
| lambda     | gpD          | 3-fold                                             | (6, 9)     |
| T4         | Soc          | Between hexamers                                   | (3, 4)     |
| phage L    | Dec          | 3-fold axes nearest to the icosahedral 2-fold axes | (7)        |
| epsilon 15 | gp10         | staples adjacent capsomers at the 2-fold axes      | (5)        |
| phage N4   | gp17         | near quasi-3-fold axes                             | (1)        |
| T4         | Hoc          | centre of hexamers                                 | (3)        |
| T5         | pb10         | centre of hexamers                                 | (2)        |
| SPP1       | gp12         | centre of hexamers                                 | (8)        |

1. **Choi, K. H., J. McPartland, I. Kaganman, V. D. Bowman, L. B. Rothman-Denes, and M. G. Rossmann.** 2008. Insight into DNA and protein transport in double-stranded DNA viruses: the structure of bacteriophage N4. *Journal of molecular biology* **378**:726-736.
2. **Effantin, G., P. Boulanger, E. Neumann, L. Letellier, and J. F. Conway.** 2006. Bacteriophage T5 structure reveals similarities with HK97 and T4 suggesting evolutionary relationships. *Journal of molecular biology* **361**:993-1002.
3. **Fokine, A., P. R. Chipman, P. G. Leiman, V. V. Mesyanzhinov, V. B. Rao, and M. G. Rossmann.** 2004. Molecular architecture of the prolate head of bacteriophage

- T4. Proceedings of the National Academy of Sciences of the United States of America **101**:6003-6008.
4. **Ishii, T., and M. Yanagida.** 1977. The two dispensable structural proteins (soc and hoc) of the T4 phage capsid; their purification and properties, isolation and characterization of the defective mutants, and their binding with the defective heads in vitro. *Journal of molecular biology* **109**:487-514.
  5. **Jiang, W., M. L. Baker, J. Jakana, P. R. Weigele, J. King, and W. Chiu.** 2008. Backbone structure of the infectious epsilon15 virus capsid revealed by electron cryomicroscopy. *Nature* **451**:1130-1134.
  6. **Lander, G. C., A. Evilevitch, M. Jeembaeva, C. S. Potter, B. Carragher, and J. E. Johnson.** 2008. Bacteriophage lambda stabilization by auxiliary protein gpD: timing, location, and mechanism of attachment determined by cryo-EM. *Structure* **16**:1399-1406.
  7. **Tang, L., E. B. Gilcrease, S. R. Casjens, and J. E. Johnson.** 2006. Highly discriminatory binding of capsid-cementing proteins in bacteriophage L. *Structure* **14**:837-845.
  8. **White, H. E., M. B. Sherman, S. Brasilès, E. Jacquet, P. Seavers, P. Tavares, and E. V. Orlova.** 2012. Capsid structure and its Stability at the Late Stages of Bacteriophage SPP1 Assembly. *J. Virology* **submitted**.
  9. **Yang, F., P. Forrer, Z. Dauter, J. F. Conway, N. Cheng, M. E. Cerritelli, A. C. Steven, A. Pluckthun, and A. Wlodawer.** 2000. Novel fold and capsid-binding properties of the lambda-phage display platform protein gpD. *Nature structural biology* **7**:230-237.

## Fourier Shell Correlations

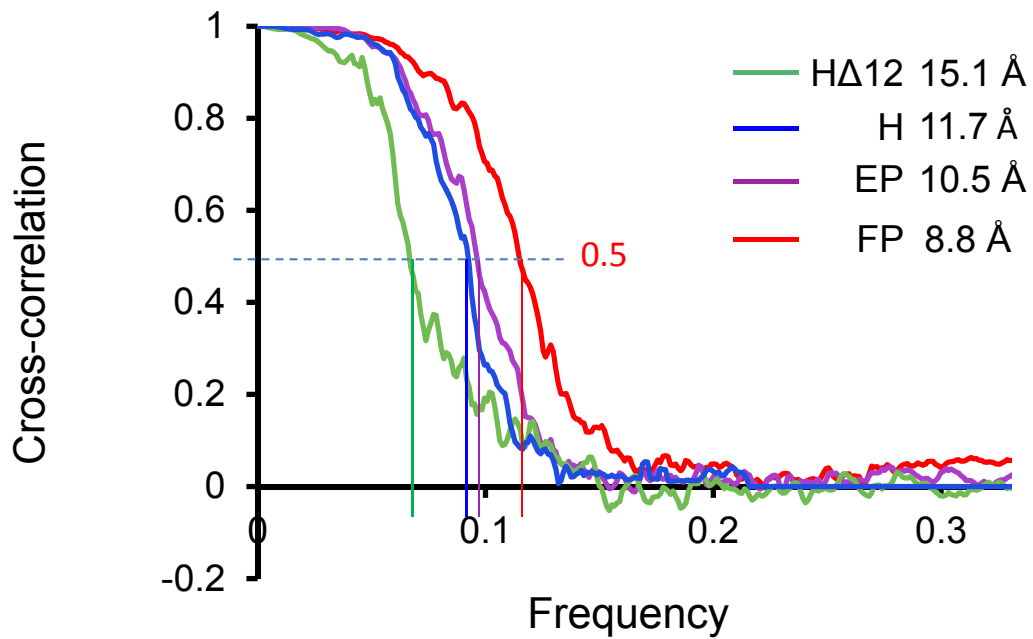

**Supplementary Fig1.** Fourier shell correlations for HΔ12 (green), H (blue), EP (purple) and FP (red) capsid reconstructions.

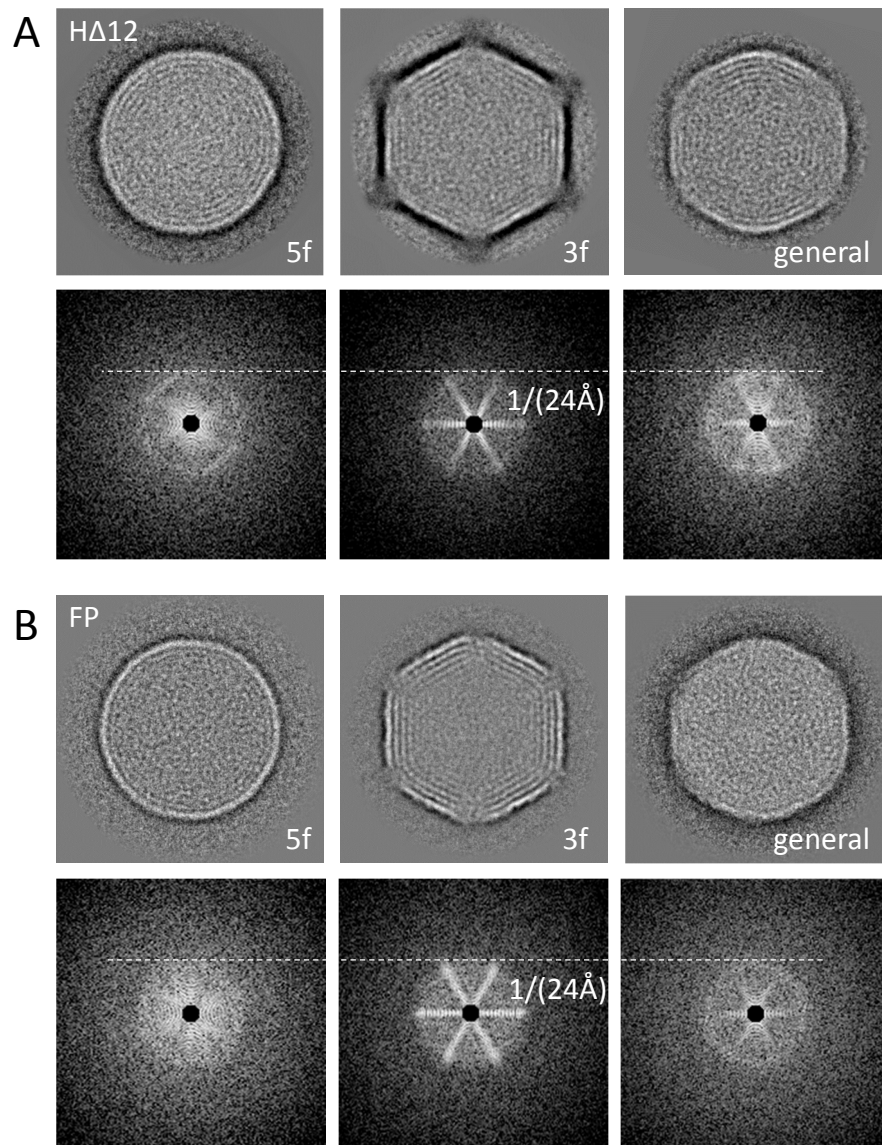

**Supplementary Fig 2.** Class averages for the 5-fold, 3-fold and a general view (top) of HΔ12 (A) and FP (B) capsids and their corresponding diffraction patterns (bottom). All diffractions (Fourier transforms) demonstrate the same distances for DNA packing in decorated and non-decorated capsids.

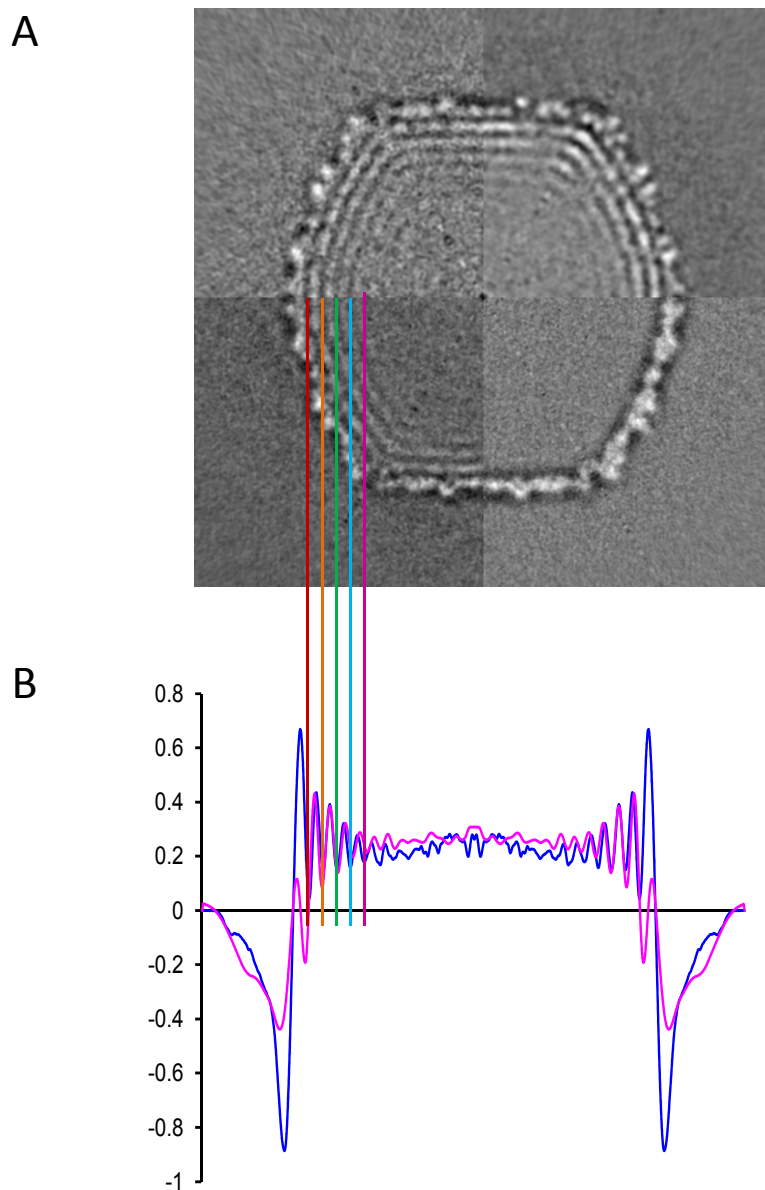

**Supplementary Fig 3.** DNA organization in 3D reconstructions of SPP1 capsids. A- Sections through the central plane of the reconstructions highlighting the concentric layers of DNA. B - Profile across a rotationally averaged central section showing the position of DNA rings in H $\Delta$ 12 (magenta) and FP (blue) 3D capsid reconstructions.

Supplementary Figure 3 (related to Figures 2 and 5)

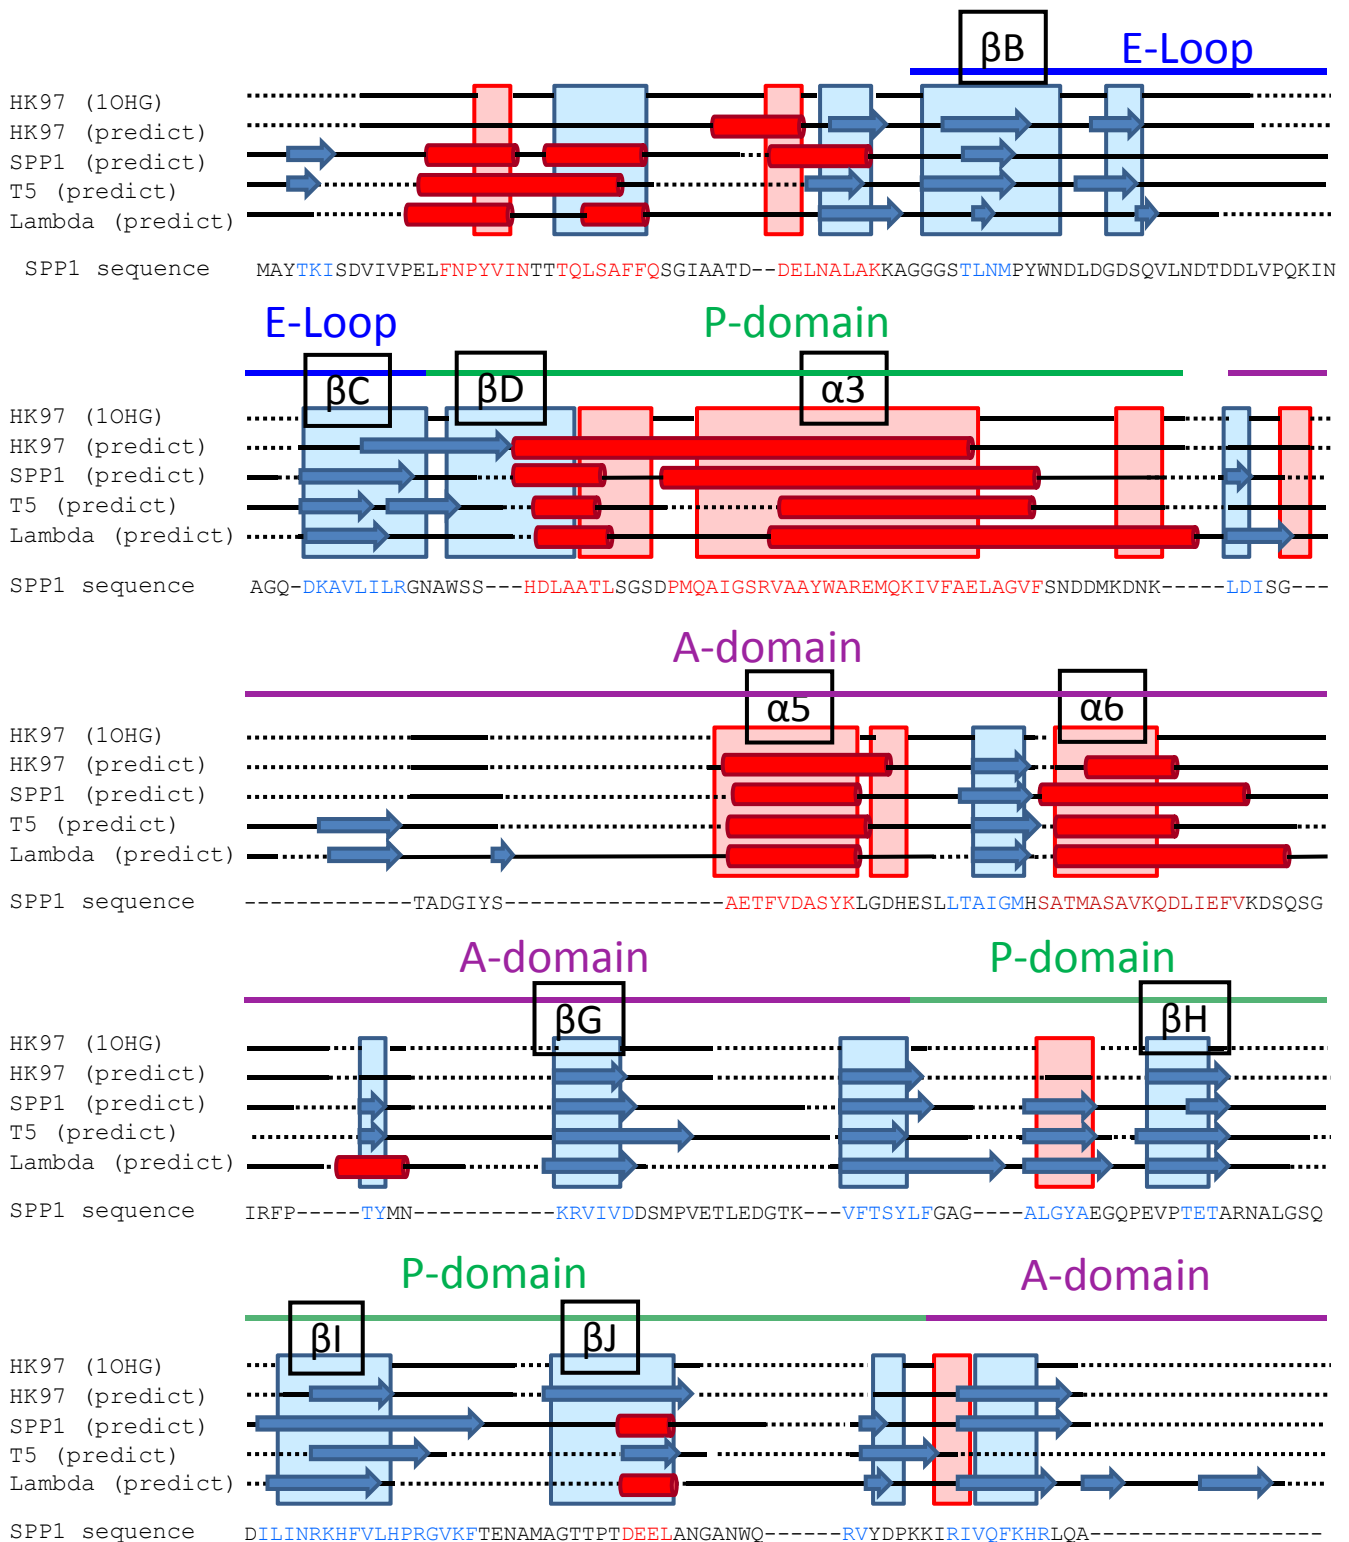

**Supplementary Fig 4.** Secondary structure alignment of major capsid proteins. The predicted secondary structures for HK97, SPP1, T5 and Lambda proteins are aligned to the secondary structure elements found in the crystallographic structure of gp5 from HK97 (1ohg). Predicted helices are shown as red cylinders and predicted  $\beta$ -strands as blue arrows. Helices in 1ohg are shown as red rectangles and  $\beta$ -strands as blue rectangles. The domain to which the sequence belongs is shown above the alignment. The SPP1 sequence, colored according to the secondary structure prediction, is shown below.

Supplementary Figure 4 (related to Figure 6)

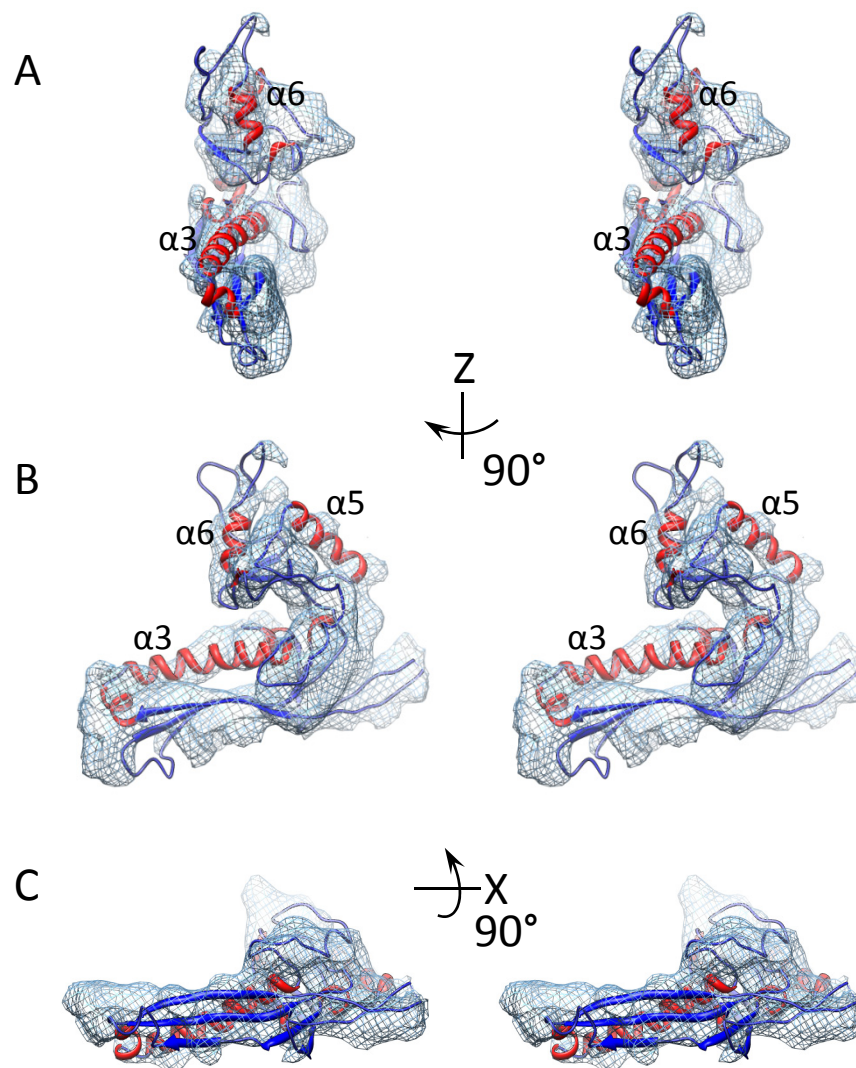

**Supplementary Figure 5.** Different views of the refined fit of the gp13 model into the EM map.

A) Stereo view of one subunit of FP with helices 3, 5, and 6 coloured red. B) Rotated by  $90^\circ$  around Z axis C) Rotated by  $90^\circ$  around X axis.
